1  
2  
3  
4  
5  
6  
7  
8  
9  
10  
11  
12  
13  
14  
15  
16  
17  
18  
19  
20  
21

## Variations in visual sensitivity predict motion sickness in virtual reality

Jacqueline M. Fulvio<sup>a</sup>, Mohan Ji<sup>a</sup>, and Bas Rokers<sup>a,1</sup>

<sup>a</sup>Department of Psychology, University of Wisconsin–Madison, 1202 W Johnson St, Madison, WI 53706, United States of America

### Author Notes

<sup>1</sup>Permanent address: Neuroimaging Center, New York University Abu Dhabi, [rokers@nyu.edu](mailto:rokers@nyu.edu)

Correspondence concerning this article should be addressed to:

Jacqueline M. Fulvio

1202 W Johnson St

Madison, WI 53706

Contact: [jacqueline.fulvio@wisc.edu](mailto:jacqueline.fulvio@wisc.edu)

22  
23  
24  
25  
26  
27  
28  
29  
30  
31  
32  
33  
34  
35  
36  
37  
38  
39  
40  
41  
42  
43  
44  
45

## Abstract

Severity of motion sickness varies across individuals. While some experience immediate symptoms, others seem relatively immune. We explored a potential explanation for such individual variability based on cue conflict theory. According to cue conflict theory, sensory signals that lead to mutually incompatible perceptual interpretations will produce physical discomfort. A direct consequence of such theory is that individuals with greater sensitivity to visual (or vestibular) sensory cues should show greater susceptibility, because they would be more likely to detect a conflict. Using virtual reality (VR), we first assessed individual sensitivity to a number of visual cues and subsequently induced moderate levels of motion sickness using stereoscopic movies presented in the VR headset. We found that an observer’s sensitivity to motion parallax cues predicted severity of motion sickness symptoms. We also evaluated evidence for another reported source of variability in motion sickness severity in VR, namely sex, but found little support. We speculate that previously-reported sex differences might have been due to poor personalization of VR displays, which default to male settings and introduce cue conflicts for the majority of females. Our results identify a sensory sensitivity-based predictor of motion sickness, which can be used to personalize VR experiences and mitigate discomfort.

Keywords: Motion sickness, Visual sensitivity, 3D Motion perception, Motion parallax, Virtual reality

## 46 1. Introduction

47           Although the visual system is often studied in relative isolation, it has clear connections  
48 to other components of the nervous system, for example in the regulation of diurnal rhythm,  
49 arousal and balance. One area where this connection is painfully clear is in the domain of motion  
50 sickness. However, there is considerable variation in the susceptibility to motion sickness across  
51 individuals, and an account for this variability has been elusive.

52           Cue conflict theory provides a potential account for motion sickness in virtual  
53 environments (see [1] for a review). The theory posits that motion sickness is the result of  
54 conflict between sensory signals that are typically in concert [2]. Although cue conflicts may  
55 arise within a single sensory modality [3], motion sickness is typically attributed to conflicts  
56 between visual and vestibular system cues (e.g., [2], [4]-[8]). From an evolutionary perspective,  
57 such conflicts were likely to occur following the ingestion of neurotoxins. Thus, the body's  
58 nausea and vomiting responses, which cause the toxin to be expelled, may have developed as the  
59 result of an evolutionary adaptation [9]-[12].

60           There is some support for a relationship between vestibular function and motion sickness.  
61 First, motion sickness does not occur in individuals who lack a vestibular system. Second, those  
62 with a dysfunctional vestibular system are particularly susceptible [13]. Finally, sensitivity of the  
63 vestibular system to self-motion predicts symptoms of motion sickness in individuals with a  
64 functioning vestibular system, although the relationship is often small and context-specific [14].  
65 To our knowledge however, a relationship between *visual* sensitivity and motion sickness has not  
66 been established.

67           To account for individual variability in motion sickness severity, we designed a series of  
68 experiments. In our experiments, we tested individual observers' sensitivity (both males and

69 females) to various cues that signal object motion. We manipulated sensory cues pertaining to  
70 object motion in depth based on the general visual equivalence between an observer moving  
71 through an environment and objects moving around an observer. Prior work has identified  
72 considerable variability in the sensitivity to visual cues that specify object motion. For example,  
73 observers exhibit independent sensitivity to interocular velocity differences (IOVD) and  
74 changing disparities (CD) [15]. Subsequent to our assessments of visual sensitivity, observers  
75 watched video footage designed to induce moderate discomfort in a virtual reality headset. We  
76 then tested the relationship between sensitivity to various sensory cues and motion sickness due  
77 to video viewing.

78 To summarize our logic, we examined a potential predictor for motion sickness severity.  
79 We reasoned that both the vestibular and visual systems provide estimates of the degree of self-  
80 motion. If these estimates tend to be highly accurate, then the system should be more likely to  
81 detect mismatches between the estimates. Indeed, we did find that the sensitivity to sensory cues  
82 to 3D motion predicted an individual's susceptibility to motion sickness. In particular, individual  
83 sensitivity to motion parallax cues produced by small head movements predicts the severity of  
84 motion sickness symptoms. In addition, we found evidence that observers self-regulate  
85 discomfort by modulating their head movement over time.

86 We subsequently explored a potential cause for previously reported sex differences in  
87 motion sickness susceptibility in virtual reality (VR). Default VR head-mounted display settings  
88 tend to be geared toward the average male. Use of default settings for individuals who deviate  
89 from the average will introduce cue conflicts into the visual display, and such deviations are of  
90 course much more likely for females. Having tailored the display to the interpupillary distance

91 (IPD) of each individual observer, we did not find differences in motion sickness susceptibility  
92 based on sex in our sample of observers (see also [16])

93 Our results suggest a number of strategies to mitigate motion sickness in VR. These  
94 strategies include reducing or eliminating specific sensory cues, reducing an observer's  
95 sensitivity to those cues by perhaps counter-intuitively degrading visual fidelity, and ensuring  
96 device settings are personalized to each observer.

97

## 98 2. Methods

### 99 2.1. Observers

100 108 observers were recruited and gave informed written consent. A total of 103  
101 successfully completed all parts of the study. Failure to complete the experiment was either due  
102 to technical issues ( $n = 3$ ), experimenter error ( $n = 1$ ), or difficulty seeing the stimuli ( $n = 1$ ).  
103 Data from an additional 8 observers were excluded because they did not achieve performance  
104 above chance level in any condition on the psychophysical task - see "3D motion discrimination  
105 task" section below. Therefore, data from a total of  $n = 95$  observers were included in the main  
106 analyses. The required sample size was based on a previous study that investigated motion  
107 sickness propensity in virtual reality [17]. The experiments were approved by the Human  
108 Subjects Institutional Review Board at the University of Wisconsin-Madison. Observers received  
109 course credit in exchange for their participation.

### 110 2.2. Display Apparatus

111 Observers viewed visual stimuli in the Oculus Rift Development Kit 2 (DK2;  
112 [www.oculusvr.com](http://www.oculusvr.com)), a stereoscopic head-mounted virtual reality system (see **Fig. 1**, "Virtual

113 reality headset” panel) with a 14.5 cm low-persistence AMOLED screen (Samsung) embedded  
114 in the headset providing a resolution of 1920x1080 pixels (960x1080 pixels per eye) with a  
115 refresh rate of 75 Hz. The horizontal field of view of the device is about 85 deg (100 deg  
116 diagonal). The device utilizes six degrees of freedom (6 DoF) head-tracking for head-motion  
117 contingent updating of the display. Positional tracking was achieved at 60 Hz with .05 mm  
118 precision via an external camera with a near-infrared CMOS sensor. Tracking of head rotation  
119 was achieved at 1000 Hz with .05 deg precision via an accelerometer, gyroscope, and  
120 magnetometer embedded in the headset. The effective tracking latency after sensor fusion was  
121 about 2 ms and head-movement-to-photon latency was about 14 ms.

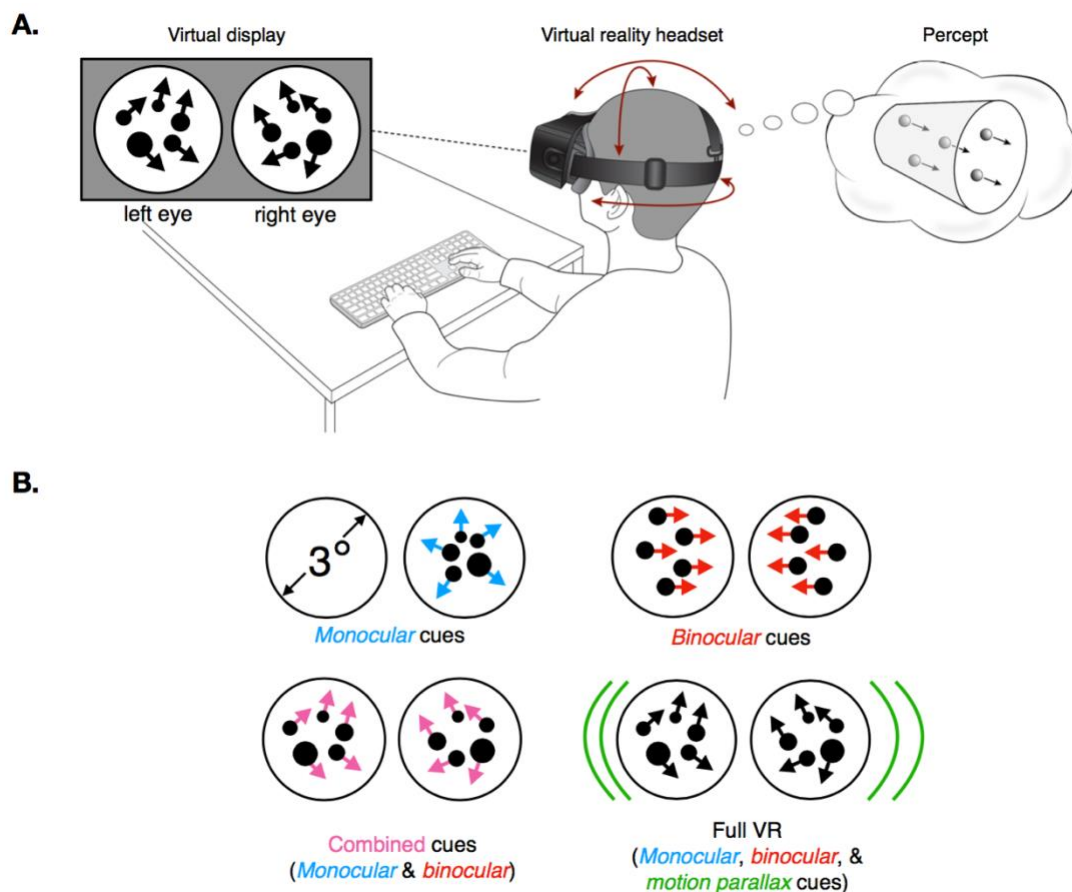

122

123 **Figure 1. Experimental details.** A. “Visual display”: Illustration of left- and right-eye stimulus  
124 elements as presented in the motion task. The illustration depicts the random dot stimulus. In the

125 actual experiment, the dot stimulus was comprised of 12 dots whose properties varied according  
126 to the sensory cue condition (see B. for more details). The dots were visible within a circular  
127 aperture in a flat surface positioned at the fixation distance of the display. “Virtual reality  
128 headset”: Seated observers viewed the stimuli in an Oculus DK2 head-mounted display. Their  
129 head movements were tracked (6 degrees of freedom) and recorded in all conditions. Depending  
130 on the experimental condition, the virtual scene updated according to the head movements.  
131 “Percept”: Observers fixated the center of the circular aperture. The random dot stimulus would  
132 appear at fixation and appear to move either towards or away from the observer for 250 ms  
133 before disappearing. Observers indicated the perceived direction of motion by button press.  
134 Observers were given unlimited time to respond. Subsequently, both visual and auditory  
135 feedback were provided. **B.** Illustration of the four sensory cue conditions tested in the motion  
136 task. In the Monocular cues condition, the dot stimulus was randomly presented to one eye on  
137 each trial. The dots changed in size and density according to their motion direction. In the  
138 Binocular cues condition, binocular disparity and interocular velocity change cues were present,  
139 while dot size and density were held constant. In the Combined cues condition, binocular  
140 disparity and interocular velocity change cues as well as dot size and density cues were present  
141 in the stimulus. Finally, in the Full VR condition, all of the cues in the Combined condition were  
142 present, as well as motion parallax cues due to head-motion contingent updating of the display.

143

144

145 The display was calibrated using standard gamma calibration procedures. Minimum and  
146 maximum display luminances were 0.01 cd/m<sup>2</sup> and 64.96 cd/m<sup>2</sup>, respectively. The experiment  
147 was controlled by MATLAB and the Psychophysics Toolbox [18]-[20] on a Macintosh computer  
148 and projected on the display of the DK2 headset. During the psychophysical task portion of the  
149 study (see next section, “3D motion direction discrimination task”), observers used a keyboard to  
150 initiate trials and make responses.

151 2.3. Experimental Procedure

152           Each observer completed a single 1-hour experimental session. After observers gave  
153 informed consent, their static stereoacuity was measured using the Randot Stereotest (Stereo  
154 Optical, Chicago, IL). All but two observers met the criterion of reaching level 5 (70 arc sec) on  
155 its graded circles test. The remaining two observers achieved a level of 4 (100 arc sec), but were  
156 included in subsequent data analyses after statistical tests demonstrated that their performance  
157 did not differ from the remaining sample. The inter-pupillary distance (IPD) was then measured  
158 for each observer using a pupillometer (Essilor Instruments, USA), providing measures in half-  
159 millimeter increments. Observers next completed the Simulator Sickness Questionnaire  
160 (“baseline SSQ”; [21]). Upon completion of the questionnaire, observers underwent a brief  
161 calibration procedure in which the DK2 headset was calibrated for their IPD and height. They  
162 were then introduced to the experimental task and completed 50 practice trials (see “Motion  
163 task” section below for more details) in the presence of the experimenter.

164           The experiment then began with the sensitivity assessment, which we describe in more  
165 detail below. Observers completed four 2.5-minute blocks of the motion task in a random,  
166 counterbalanced order across observers. Observers took brief breaks between these blocks,  
167 during which they completed the SSQ (“post task”). After the final block and SSQ, observers  
168 entered the motion sickness phase of the experiment. They watched up to 22.5 min of  
169 stereoscopic video content with the option to quit if the experience became intolerable. Upon  
170 completion of the video content (or quitting the viewing), observers completed another SSQ  
171 (“post video”). In the final five minutes, observers were asked to complete a brief questionnaire  
172 reporting on their experience with motion sickness and virtual reality prior to our experiment,  
173 and they were debriefed about the study. Prior to leaving, they completed a final SSQ (“end of



174 session”). During all phases of the experimental procedure, observers remained seated. No  
175 restraints (i.e., forehead or chin rests) were used.

#### 176 2.4. Motion Task

177 The sensitivity assessment was based on observers’ performance on a 3D motion  
178 direction discrimination task. Observers judged the motion direction of a set of 12 white dots 0.2  
179 cm in diameter at the 1.2 m fixation distance (**Fig. 1A**, “Virtual display” panel). The dots  
180 appeared at the center of a visual scene and moved toward or away from the observer at ~96  
181 cm/s for 0.25 s before disappearing. These world-based stimulus parameters translate to a dot  
182 diameter of 0.1 deg (or 0.9 pixels) at the fixation distance. Dots moved at 1.2 deg/s. When a dot  
183 reached a disparity of  $\pm 0.15^\circ$ , we flipped its disparity sign and assigned a new  $x$  and  $y$  position. In  
184 this way, the stimulus appeared as a volume of dots centered on the fixation plane where each  
185 dot moved continuously toward or away from the observer. Note that in all but the Binocular  
186 Cues condition (see below), dot size and density changed in a manner consistent with projective  
187 geometry. As illustrated in the Supplementary Materials videos, changes in dot size were  
188 probably not very noticeable to observers given the resolution of the display, but changes in dot  
189 density could be clearly seen.

190 Motion coherence was manipulated by varying the proportion of signal to noise dots. For  
191 each trial, we pseudo-randomly selected a motion coherence level from [0% 16.67% 50% 100%]  
192 coherence for 13 of the observers, and from [16.67% 50% 100%] for the remaining 82 observers.

193 On each stimulus frame, we randomly selected a subset of dots as signal dots, which  
194 moved coherently, either toward or away from the observer (perpendicular to the screen). The  
195 remaining dots (noise dots) were given random  $x$ ,  $y$ , and  $z$  coordinates. Signal and noise dots  
196 were selected on a frame-by-frame basis to help prevent observers from tracking the direction of

197 motion of individual dots. Direction of motion (i.e., “toward” or “away”; see **Fig. 1A**, “Percept”  
198 panel) was chosen pseudo-randomly on each trial.

199 Multiple visual cues signal motion in depth [22]-[24]. We aimed to quantify observer  
200 sensitivity to each cue by manipulating the available cues in the dot motion stimulus. We tested  
201 sensitivity in four conditions: *Monocular cues* (dot size and density changes were presented, but  
202 binocular cues were eliminated by presenting the stimulus to one eye only), *Binocular cues*  
203 (containing binocular disparity and inter-ocular velocity differences, but monocular cues were  
204 eliminated by keeping dot size and density constant), *Combined cues* (containing both the  
205 monocular and binocular cues), and *Full VR* (containing the combined cues as well as motion  
206 parallax cues due to head movement) (see **Fig. 1B** and see **Supplemental Material** for videos  
207 illustrating the four cue conditions). It is important to note that in the Monocular cues condition,  
208 the dots were presented to one pseudo-randomly chosen eye on each trial.

209 The motion stimuli were presented in the center of a virtual room (3 m in height, 3.52 m  
210 in width, and 3.6 m in depth). While this room served no function during the actual experiment,  
211 it helped observer immersion during initial instruction. The virtual walls, ceiling, and floor were  
212 all mapped with different tiled textures to facilitate better judgment of distances throughout the  
213 virtual space and judgment of the stimulus motion trajectories. The room contained a surface (i.e.  
214 wall) that was positioned at the display’s focal distance (1.2m from the observer). The wall was  
215 textured with a 1/f noise pattern that aided accommodation and vergence. Stimuli were presented  
216 within a 3 deg radius circular aperture located in the center of the wall with the dots confined to  
217 the central 2.4 deg to prevent occlusion by the aperture’s edge. Thus, dots appeared to move  
218 through an aperture in a wall, and either approached or receded from the observer depending  
219 upon the pseudo-randomly selected motion for that trial. A small (0.04 deg) white fixation point

220 was visible in the center of the aperture at all times except when a dot motion stimulus was  
221 presented. All stimulus elements were anti-aliased to achieve subpixel resolution.

222 Observers were instructed to report the dot motion direction. Observers indicated the  
223 direction of dot motion by pressing the up arrow key on the keyboard for receding motion and  
224 the down arrow key for approaching motion. In recent work, feedback was shown to be critical  
225 for the recruitment of sensory cues in VR displays, especially binocular and motion parallax cues  
226 to motion-in-depth [25]. Likewise, to encourage recruitment of the sensory cues in the different  
227 conditions in the current study, observers received auditory feedback (a “cowbell” sound on  
228 correct trials and a “swish” sound on incorrect trials) as well as visual feedback (behavioral  
229 performance up to and including the current trial in terms of percent correct was displayed at the  
230 fixation point). If the most recent response was correct, the performance was displayed in green;  
231 if incorrect, in red.

232 During stimulus presentation, observers were asked to keep their head still and maintain  
233 fixation. In all but the Full VR condition, head movement had no effect on the display so that it  
234 appeared to the observer that the virtual environment was “glued” to the head. In the Full VR  
235 condition, the visual display updated according to head movement, so that it appeared that the  
236 observer was present in a stationary immersive virtual environment.

237 Observers completed the task in four 2.5-minute blocks after completing 50 practice trials  
238 with feedback in the Full VR cue condition. Observers that were presented with four coherence  
239 levels completed 84 trials, and observers that were presented with three coherence levels  
240 completed 90 trials with each of the blocks. All observers completed four blocks in a  
241 randomized, counterbalanced order. Each block contained stimuli from one of the four cue  
242 conditions (Monocular, Binocular, Combined, or Full VR). Between blocks, observers took short

243 breaks during which they removed the VR headset and completed the Simulator Sickness  
244 Questionnaire (see “Quantifying motion sickness” section below).

## 245 2.5. Video Content

246 Observers viewed up to four stereoscopic videos [17], totaling ~22.5 min in the VR  
247 headset, played in Windows Media Player. The four videos increased in level of intensity: (1) a  
248 5:34 min, first-person video of a car driving through mild traffic, (2) a 3 min first-person  
249 computer-generated (CG) video of a fighter jet flying through a canyon, (3) a 6:26 min first-  
250 person video of a drone flying through a parking lot, and (4) a 7:19 min first-person video of a  
251 drone flying around a bridge (see **Fig. 2** for stills from the four videos). All observers watched  
252 the videos in the same order. Observers were told they could stop viewing the videos if and when  
253 the experience became intolerable. The total viewing time was recorded for each observer.

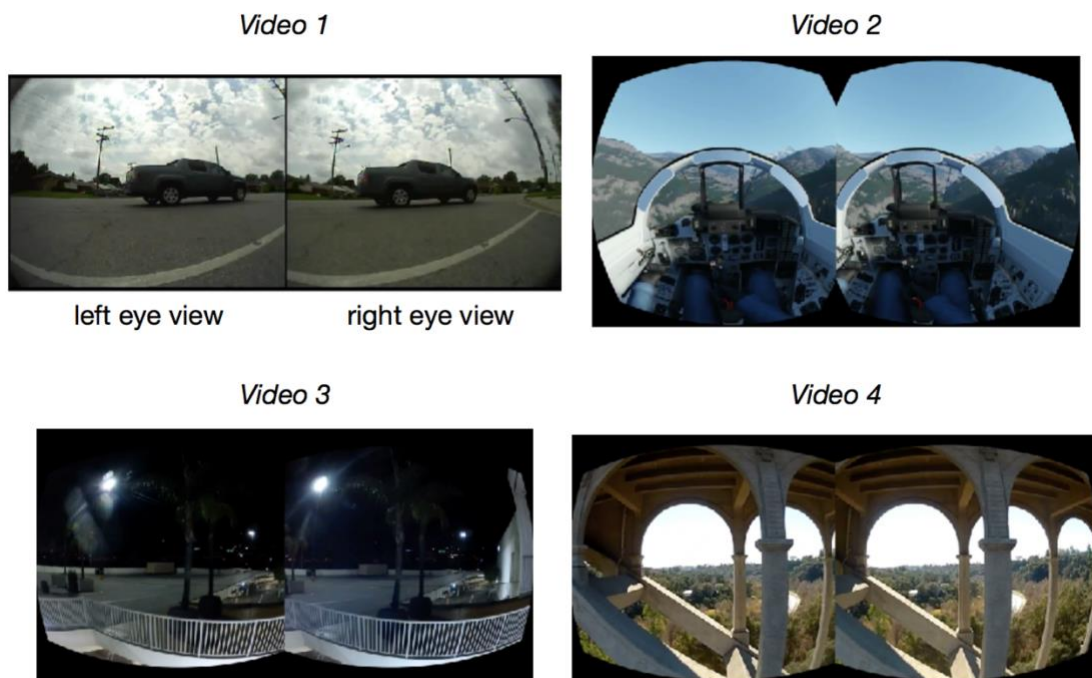

255 **Figure. 2. Stills from motion sickness inducing videos.** After completing the four blocks of the  
256 motion task, all observers viewed up to four videos while wearing the Oculus DK2 head-  
257 mounted display in the same order (up to 22.5 minutes). The videos increased in intensity, and  
258 observers were given the option to quit if viewing became intolerable. All observers, whether  
259 they stopped the video viewing early or not, completed the Simulator Sickness Questionnaire  
260 (SSQ) to indicate the severity of motion sickness symptoms.

261

## 262 2.6. Data Analysis

### 263 2.6.1. Quantifying Sensitivity

264 For each cue condition, we calculated the proportion of ‘toward’ responses as a function  
265 of direction and motion coherence. Standard error of the mean (SEM) was calculated based on  
266 the binomial distribution of the (toward/away) responses. We fit the proportion of toward  
267 responses  $g(x)$  as a function of direction and motion coherence ( $x$ ) with a cumulative Gaussian  
268 using nonlinear least squares regression using the `lsqcurvefit` function in MATLAB:

$$269 \quad g(x) = \lambda + (1 - 2\lambda) \frac{1}{2} \left[ 1 + \operatorname{erf} \left( \frac{x - \mu}{\sigma\sqrt{2}} \right) \right], \quad (1)$$

270 where  $x$  is the directionally-signed motion coherence,  $\mu$  is the estimate of observer bias,  $\sigma$   
271 reflects the precision of the responses for the respective sensory cue condition, and  $\lambda$  is the lapse  
272 rate. To stabilize fits when precision was low, we enforced a bound of  $\pm 0.5$  on  $\mu$  and bounds of  
273  $[0.01 \ 100]$  on  $\sigma$ . The fitting procedure assumed a lapse rate of 2%. Sensitivity was computed as  
274  $1/\sigma$ .

275 We computed median fit parameters using a bootstrap procedure to ensure stable  
276 estimates. We resampled the “toward”/“away” response data with replacement 1,000 times for

277 each observer. We then fit a psychometric function to each resampled data set. Finally, we  
278 obtained the median parameter estimates from the fits.

279 To determine if the performance of each observer for each cue condition was different  
280 from chance, we simulated performance of an observer who responded randomly on each trial  
281 for 90 total trials for three coherence levels and 84 trials for four coherence levels. We fit  
282 psychometric functions to 10,000 simulated data sets and obtained the sensitivity estimate from  
283 each. At the 95% confidence level, the upper sensitivity bound was .49/.43 for the conditions  
284 with four and three coherence levels, respectively. If an observer's performance did not exceed  
285 these bounds, (i.e., perform above chance level) in any of the four conditions, the observer was  
286 excluded from further analyses ( $n = 8$ ).

## 287 2.6.2. Quantifying Motion Sickness

288 To quantify motion sickness, observers completed the SSQ at six separate time points  
289 during the experimental session (see "Experimental Procedure" above). Observers rated the  
290 severity of 16 symptoms as "none", "slight", "moderate", or "severe", which were then  
291 numerically scored as 0, 1, 2, and 3, respectively. The symptoms form three subscales: (1)  
292 nausea (N) ranging from 0 - 200.34, (2) oculomotor disturbances (OD) ranging from 0 - 159.18,  
293 and (3) disorientation (D) ranging from 0 - 292.32. The severity of symptoms on each of the  
294 three scales was computed via standardized formulas (see [21]), which were then combined  
295 using a final formula to produce an overall ("Total") sickness score ranging from 0 - 235.62.  
296 Larger scores correspond to more severe symptoms on all scales. Although the sickness scores  
297 were computed for each of the six questionnaires completed by each observer during the  
298 experimental session, we were primarily interested in the effects of the video viewing. To  
299 quantify the impact of video viewing on sickness levels, we computed the change in motion

300 sickness from before the video viewing (based on the “post task” SSQ) to after the video viewing  
301 (“post video” SSQ).

### 302 2.6.3. Quantifying Head Movement

303 We used the head-tracking capabilities of the virtual reality device to measure head  
304 movement during the assessment of visual sensitivity. Head movements during the task were  
305 relatively small due to the presentation of the stimulus at fixation for a brief time - we therefore  
306 refer to these small head movements as “head jitter” [25]. We analyzed translational head jitter  
307 and rotational head jitter based on the 6 DoF head tracking built into the DK2 headset. For each  
308 block of the motion task, a single continuous head trace was saved, containing the 4x4 model  
309 view matrix for each eye at every screen refresh (75 Hz or ~13.33 ms). We inverted the model  
310 view matrix and determined the “cyclopean” view matrix at each time point based on the  
311 midpoint between the two eyes’ views. From these traces, we extracted the time points that  
312 corresponded to each individual trial in order to analyze the head movement on a trial-by-trial  
313 basis. No additional transformations were applied.

314 To quantify translation, we computed the head’s path length through 3D space  
315 (‘translational jitter’) for each trial. We path-integrated the translation of the head by summing  
316 the Euclidean distance between each consecutive head position obtained from the X, Y, and Z  
317 components of the “cyclopean” view matrix. Point-to-point estimates  $\geq 0.002$  m (which  
318 corresponded to a velocity  $\geq 0.15$  m/s) were excluded because they were unrealistically large and  
319 likely reflected tracking errors (~9.5% of all time points across all observers, conditions, and  
320 trials). Thus, when an erroneous tracking time point was identified, the path integration ignored  
321 that point. Because the distributions of translational jitter were typically positively skewed, we

322 computed the median translation for each observer. Average translational jitter was then  
323 computed across observers.

324         Similar methods were used to quantify rotation. We first computed the total angular  
325 distance that the head rotated in 3D space on each trial ('rotational jitter'). To do so, we extracted  
326 the rotation components (i.e., the first three rows and columns) from the 4x4 "cyclopean" view  
327 matrix  $M$ .  $M$  was then decomposed to determine the amount of rotation about each axis in the  
328 following order: y (yaw), z (roll), and x (pitch). To calculate the total rotation, the observers'  
329 orientation at the start of the trial was represented by the vector (0, 0, 1), which corresponded to  
330 the observer looking straight ahead. Following time point 1, the direction vector at each time  
331 point was calculated by computing the dot product of  $M$  and the starting vector (0, 0, 1). Total  
332 rotational jitter was computed by summing the total head rotation between every two adjacent  
333 time points (i.e., the absolute angle between two successive vectors). Point-to-point estimates of  
334 rotation that were  $\geq \sim 28.5$  arcmin (which corresponded to an angular velocity of  $\sim 36$  deg/s) were  
335 excluded ( $< 1\%$  of all time points across all observers, conditions, and trials). As with the  
336 computation of translational jitter, when an erroneous tracking time point was identified, the path  
337 integration ignored that point. Rotational jitter distributions were typically positively skewed, so  
338 we computed the median rotation for each observer. Average rotational jitter was then computed  
339 across observers.

## 340 2.7. Statistical Analysis

341         To assess changes in motion sickness SSQ scores were obtained at three different  
342 timepoints (baseline, post-task and post-video). We subsequently computed the difference  
343 between baseline and post-task scores, as well as post-task and post-video scores for each  
344 observer and computed the significance of these differences using the Wilcoxon signed rank test.



345 Since we evaluated the Total SSQ scores as well as the scores on each of the three SSQ subscales  
346 these tests were carried out at the Bonferroni-corrected alpha level of .0125.

347 The relationship between sensitivity in each stimulus condition and motion sickness due  
348 to video viewing were quantified through an analysis of variance (ANOVA) evaluated on  
349 general linear model fits to the individual subject data for each of the sensory cue conditions with  
350 sensitivities ( $1/\sigma_{cue}$ ) included as a fixed effect and subject included as a random effect, specified  
351 as  $\Delta SSQ \sim 1/\sigma_{cue} + (1 | \text{Subject})$ . Individual sensitivity values that were three standard deviations  
352 beyond the mean in each of the cue conditions were excluded from the analysis, yielding: n = 95,  
353 93, 94, 94 data points included in the model for the Full VR, Combined, Monocular, and  
354 Binocular, respectively. A Bonferroni-corrected alpha level of .0125 was used to test for  
355 significance of the four relationships. Effect size is reported as  $\Omega^2$ .

356 The role of sex in the relationship between sensitivity to the cues in the Full VR condition  
357 and motion sickness due to video viewing was evaluated through an ANOVA evaluated on  
358 general linear model fits to the individual subject data with sensitivity to the Full VR condition  
359 ( $1/\sigma_{FullVR}$ ) and sex included as fixed effects along with their interaction and subject included as a  
360 random effect. Significance of the main effects and the interaction was evaluated at the alpha =  
361 .05 level.

362 Patterns of head jitter were analyzed over time. For each observer, head jitter was  
363 averaged for each trial over the four blocks of the motion task (i.e., the sensitivity assessment  
364 portion of the experiment), giving a within-subject mean head translation (in mm) and within-  
365 subject mean head rotation (in arcmin) for each trial. We fitted linear, quadratic, and power  
366 models to the between-subject mean head translation and between-subject mean head rotation  
367 across trials, with the first 5 trials omitted to ensure stable behavior at the start of the trial. An

368 AIC model comparison indicated that the quadratic model best-characterized the pattern of head  
369 translation and rotation across trials and subjects. We then carried out two multiple quadratic  
370 regressions, one for translational head jitter and one for rotational head jitter. These models  
371 tested for an effect of average observer sensitivity to the sensory cue conditions on head jitter,  
372 controlling for trial (i.e., time spent in the device) with subject included as a random effect.  $N =$   
373 8075 total data points per head jitter type were supplied to the model, however, outliers that were  
374 3 standard deviations beyond the mean at each time point (i.e., trial) were excluded for  
375 consistency with other analyses (~1% & ~2% of all data points for translational and rotational  
376 head jitter, respectively). This exclusion did not change the overall results or their interpretation.  
377 Significance of the effect of sensitivity was evaluated at the  $\alpha = .05$  level.

### 378 3. Results

#### 379 3.1. Variability in Sensitivity to 3D Motion Cues in VR

380 We first assessed sensitivity to 3D motion cues in virtual reality. Each observer judged  
381 the direction (toward/away) of a cloud of dots moving with variable coherence levels. We fit a  
382 cumulative Gaussian to the observer's performance and used the inverse of the standard  
383 deviation ( $1/\sigma$ ) as an estimate of the observer's sensitivity. Each observer's motion sensitivity  
384 was tested in four cue conditions (Monocular, Binocular, Combined, and Full VR). Combined  
385 stimuli contained both monocular and binocular cues, and Full VR stimuli contained the  
386 Combined condition cues as well as motion parallax cues.

387 We found considerable variability in sensitivity to the different sensory cues (**Fig. 3**). Cue  
388 sensitivity varied both within and across observers. On average sensitivity was greatest when  
389 more cues were available (Full VR and Combined Conditions), and smallest when fewer cues  
390 were available (Monocular and Binocular Conditions), and binocular cue sensitivity was

391 generally weakest. However, observers with lower sensitivity in one sensory cue condition were  
392 not necessarily those with lower sensitivity in the other conditions. Importantly, variability  
393 among observers *within* each sensory cue condition was larger than the variability in sensitivity  
394 *between* the four cue conditions. These effects do not appear to be related to stereoacuity as  
395 Randot performance did not predict sensitivity in any of the cue conditions ( $p > .05$  for all  
396 conditions).

397

398

399

400

401

402

403

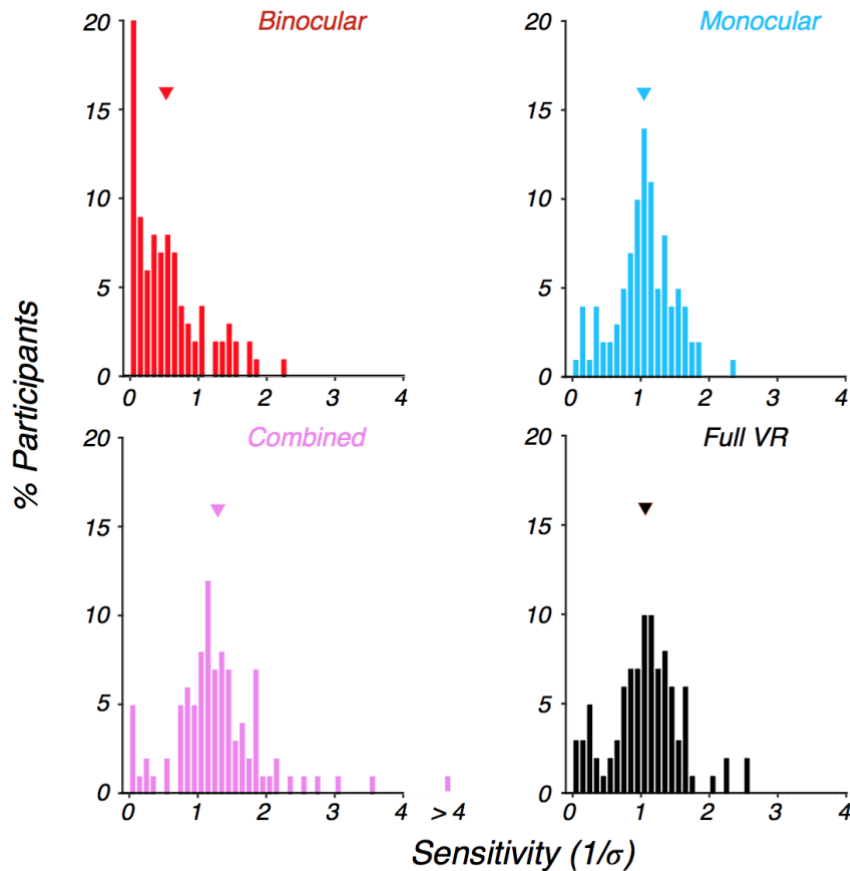

404

405 **Figure 3. Sensitivity to 3D motion cues varies across observers.** On average sensitivity is  
406 greatest when more cues are available (Full VR and Combined Conditions), and smallest when  
407 fewer cues are available (Monocular and Binocular Conditions), with binocular cue sensitivity  
408 being particularly poor. However, variability among observers within each sensory cue condition  
409 was considerably greater than the variability in sensitivity between the four cue conditions,  
410 indicating considerable inter-observer sensitivity differences to each cue. Each panel reflects the  
411 distribution of sensitivity to the particular cue condition across  $n = 95$  observers. Bars in the  
412 histograms correspond to the % of participants falling in each sensitivity bin, and the triangles  
413 correspond to the between-subject mean sensitivity for the condition.

414

415 3.2. VR Video Content Induces Motion Sickness

416 We next assessed the susceptibility to motion sickness in the same observers using the  
417 Simulator Sickness Questionnaire (SSQ; [21]). This questionnaire was developed to quantify the  
418 symptoms most commonly experienced by users of virtual reality systems and has been normed  
419 to provide scores on three categorical scales. Larger scores indicate more intense motion sickness  
420 symptoms. Observers completed the SSQ at several points in time throughout the study (see  
421 Methods for more details): 1. after consenting to participate in the study, prior to any VR  
422 exposure (“baseline”); 2. immediately after the motion task, prior to viewing the video content  
423 (“post task”); 3. immediately after viewing the video content (“post video”).

424 Observers generally reported little sickness at the beginning of the study (**Fig. 4**, blue  
425 bars). Increases in motion sickness symptoms were reported after completion of the motion task  
426 (red bars). Wilcoxon signed rank tests of the pre- and post-task SSQ ratings indicated that ratings  
427 were significantly higher for the post-task Total SSQ and the three SSQ subscales ( $p < .001$  for  
428 all tests). Larger increases in motion sickness were observed post-video viewing, producing  
429 moderate levels of motion sickness on average. Wilcoxon signed rank tests of the pre- and post-  
430 video SSQ ratings indicated that ratings were significantly higher for the post-video Total SSQ  
431 and the three SSQ subscales ( $p < .001$  for all tests), confirming that our manipulation of motion  
432 sickness had its intended effect (yellow bars). Of note, as with the results of the sensitivity  
433 assessment (i.e., performance in the motion task), there was considerable variability across  
434 observers in the intensity of motion sickness symptoms throughout the study, with some  
435 individuals appearing highly sensitive to the manipulation and others apparently insensitive to it.

436

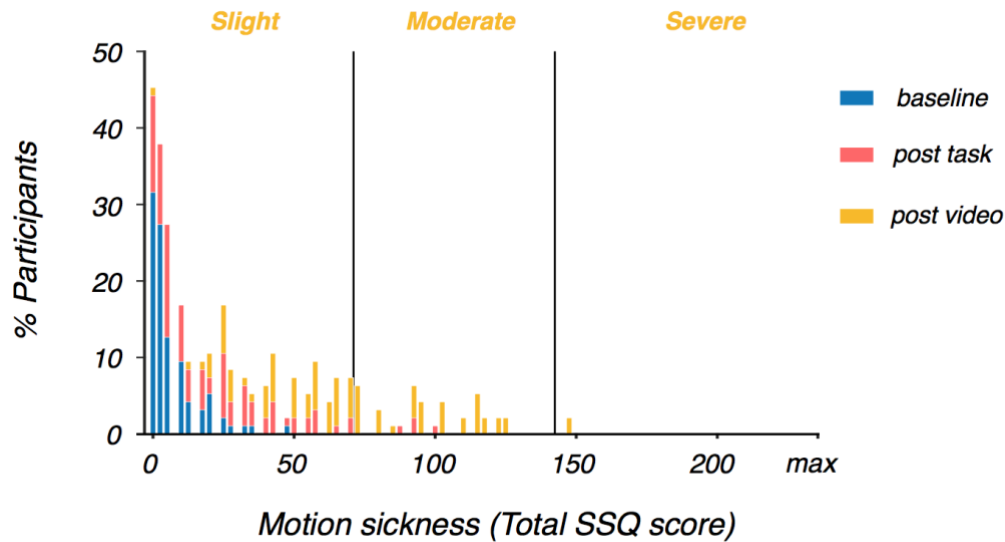

437

438 **Figure 4. VR video viewing increased motion sickness.** Prior to any VR exposure in the  
439 laboratory (baseline - blue bars), observers reported minimal sickness symptoms. Post motion  
440 task (i.e., the cue sensitivity assessment - red bars), observers reported slightly elevated sickness  
441 symptoms on average. Post video viewing (orange bars), observers reported moderate sickness  
442 symptoms on average, as expected. In the analyses reported below, we focused on the change in  
443 sickness symptoms directly pre and post video viewing (i.e., post video - post task). The  
444 maximum attainable score on the Total SSQ scale is 235.62. See Methods for details.

445

446 The increased levels of motion sickness with video viewing were not unexpected given the  
447 sensory cue conflicts in the video content. In particular, although care was taken to ensure that  
448 the HMD was tailored to the inter-pupillary distance (IPD) of each observer, the binocular  
449 disparity in the video content was fixed according to the disparity of the original recording. In  
450 addition, the video content provided motion parallax information consistent with the recording  
451 camera's movement, not the observer's head movement.

452 3.3. Sensitivity to 3D Motion Cues Predicts Motion Sickness

453           We predicted that observers with greater sensitivity to sensory cues would experience  
454 more severe motion sickness. Specifically, we hypothesized that sensory cue conflicts give rise  
455 to motion sickness, and observers with high sensory sensitivity would be more likely to detect  
456 cue conflicts while viewing the VR videos. Thus, when considering the relationship between the  
457 motion sickness related to video viewing and sensitivity to the sensory cues, we expected a  
458 positive relationship. We found the expected positive relationship in the Full VR condition  
459 ( $F(1,93) = 14.21, p < .001, \Omega_2 = .1302$ ; see **Fig. 5**). We did not find a significant relationship  
460 between cue sensitivity and motion sickness in any of the other conditions ( $p > .0125$ , the  
461 Bonferroni-corrected alpha-value; see **Table 1**).

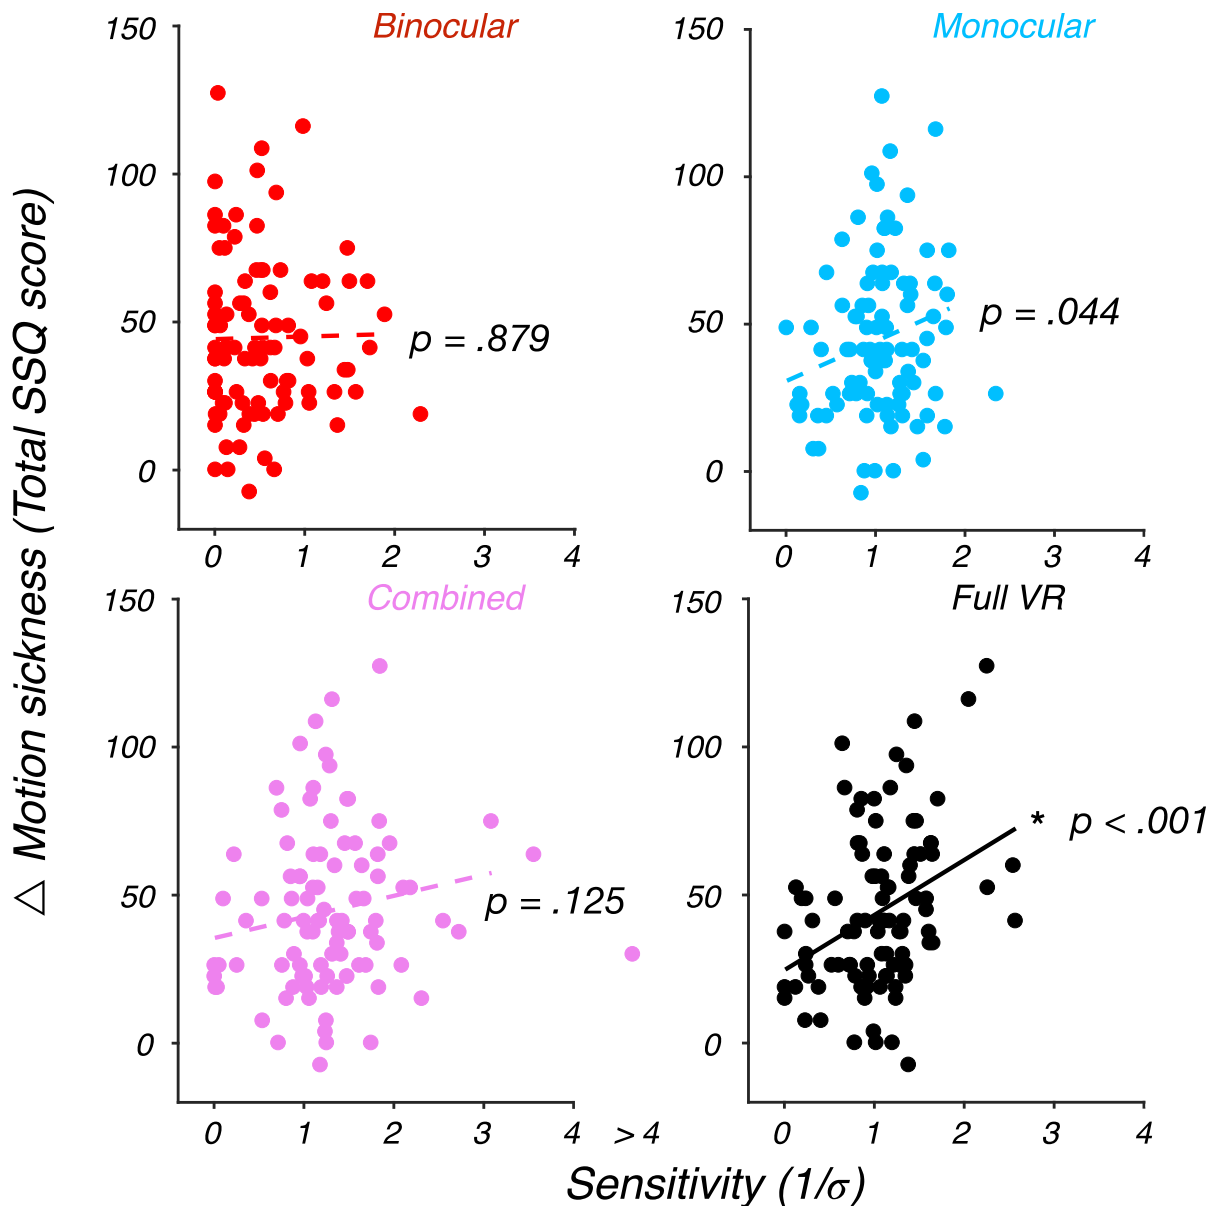

462

463 **Figure 5. Sensitivity to motion cues in the Full VR condition predicts motion sickness.** For  
464 each of the four sensory cue conditions, we computed the relationship between sensitivity to the  
465 sensory cues and severity of motion sickness due to video viewing. Solid line denotes a  
466 significant relationship at the Bonferroni-corrected alpha level = .0125. The relationship is  
467 significant only for the Full VR condition. Given that the Full VR condition is the only of the  
468 four sensory cue conditions that contains motion parallax cues, this result suggests that  
469 sensitivity to motion parallax information in particular predicts sickness due to video viewing  
470 where motion parallax cues are unavailable.



| Cue condition                              | Motion sickness (SSQ)          |                                 |                               |                       |
|--------------------------------------------|--------------------------------|---------------------------------|-------------------------------|-----------------------|
|                                            | Total sickness                 | Nausea                          | Disorientation                | Oculomotor Discomfort |
| Monocular                                  | $p = .044$                     | $p = .073$                      | $p = .279$                    | $p = .029$            |
| Binocular                                  | $p = .879$                     | $p = .314$                      | $p = .636$                    | $p = .906$            |
| Combined<br>(Monocular + Binocular)        | $p = .125$                     | $p = .039$                      | $p = .556$                    | $p = .227$            |
| Full VR<br>(Combined +<br>Motion parallax) | <b><math>*p = .0003</math></b> | <b><math>*p = .00002</math></b> | <b><math>*p = .003</math></b> | $p = .041$            |

*\*denotes significance at the Bonferroni-corrected alpha level of .0125*

471 **Table 1: Nausea and disorientation in VR are predicted by sensitivity to motion cues in the**  
472 **Full VR condition.** Entries correspond to the p-values of the relationships between sensory cue  
473 sensitivity in each cue condition and motion sickness due to VR video viewing. Bold p-values  
474 with an asterisk denote significance at the Bonferroni-corrected alpha level = .0125. The total  
475 sickness score is derived from a combination of the scores on the three separate sub-scales:  
476 Nausea, Disorientation, and Oculomotor discomfort. The significant relationship between the  
477 total sickness score and sensitivity to the cues in the Full VR condition are primarily driven by  
478 Nausea and Disorientation scale symptoms. The trend towards a relationship between the total  
479 sickness score and sensitivity to the cues in the Monocular condition may be primarily driven by  
480 Oculomotor discomfort arising from the dot stimulus being visible in only one eye on each trial.

481

482 This relationship was specific to two of the three SSQ sub-scales. Sensitivity to the  
483 sensory cues in the Full VR condition was highly-correlated with Nausea scale symptoms  
484 ( $F(1,93) = 19.79, p < .001, \Omega_2 = .1724$ ) and Disorientation scale symptoms ( $F(1,93) = 9.21, p =$   
485  $.003, \Omega_2 = .0884$ ). No relationship was identified between Full VR sensory cue sensitivity and

486 Oculomotor Discomfort scale symptoms ( $p > .0125$ , the Bonferroni-corrected alpha-level). We  
487 did not find significant relationships between sensitivity to the sensory cues in the Monocular,  
488 Binocular, and Combined conditions and these sub-scales ( $p > .0125$  in all cases, see **Table 1**).

489 Thus, we found a strong relationship between motion sickness severity and sensory  
490 sensitivity in the Full VR condition, which contained motion parallax cues. By contrast, we find  
491 little evidence for such a relationship in any of the other conditions, which did contain various  
492 other cues to stimulus motion, but did not contain motion parallax cues. Taken together, these  
493 results confirm the role of cue conflicts in motion sickness, suggesting that observers who are  
494 more sensitive to visual motion parallax cues are more likely to develop sickness symptoms in  
495 VR.

#### 496 3.4. No Relationship Between Sex and Motion Sickness

497 The above analysis indicates that sensitivity to sensory cues, particularly to motion  
498 parallax cues, plays a critical role in motion sickness. Previous work has revealed sex differences  
499 in susceptibility to motion sickness as well. Specifically, women are thought to be more  
500 susceptible to severe motion sickness due to greater postural instability and larger postural sway  
501 in non-VR [26], as well as VR environments [27].

502 We tested for a relationship between sex and motion sickness in addition to the sensitivity  
503 to the cues in the Full VR condition. However, we did not find a significant role of sex in our  
504 data ( $F(1,91) = 0.83$ ,  $p = .36$ ), nor an interaction between sex and sensitivity in motion sickness  
505 ( $F(1,91) = 2.61$ ,  $p = .11$ ). Finally, the relationship between sensitivity and sickness reported  
506 above remained significant when accounting for the sex of the observer in our model ( $F(1,91) =$   
507  $14.91$ ,  $p < .001$ ; **Fig. 6**).

508

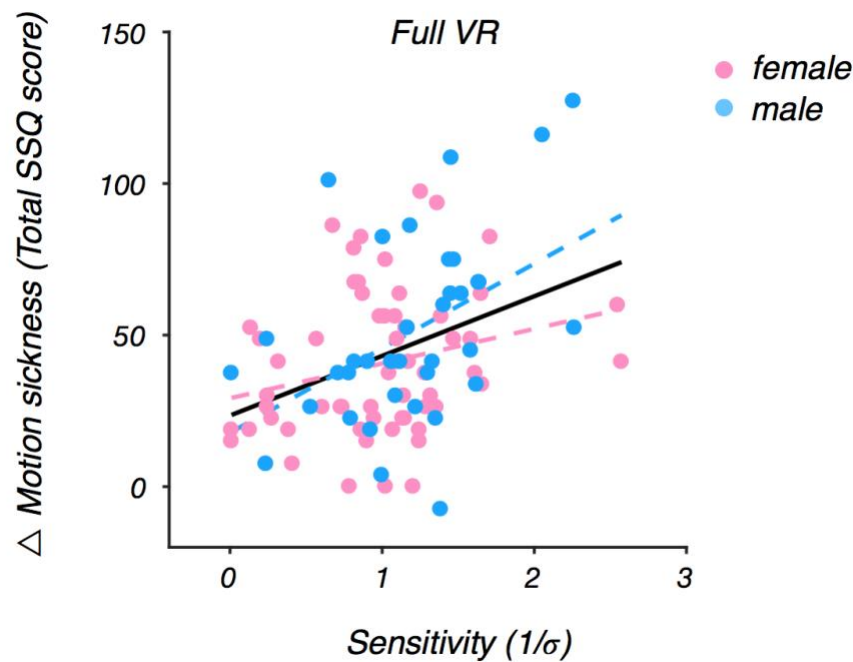

509

510 **Figure. 6. Motion sickness is predicted by visual sensitivity in Full VR but not sex.** The plot  
511 depicts the same data as in Fig. 5 - Full VR with sex of the observer denoted. Solid line denotes  
512 significance at the  $\alpha = .05$  level. The relationship between sensitivity and sickness with effect  
513 of sex removed remains significant (solid line), and the effect of sex is not significant. The  
514 dashed lines correspond to the sensitivity - sickness relationship for female (pink) and male  
515 (blue) observers.

516

517 A possible source of discrepancy between current results showing no effect of sex and  
518 previous reports may relate to inter-pupillary distance (IPD; [16]). Previous studies have largely  
519 relied upon a default IPD when presenting experimental stimuli. Default IPDs of stereoscopic  
520 stimuli are typically set to 63-64 mm. In the current study, however, we tailored the device to the  
521 IPD measurements taken for each observer at the start of the experiment.

522           Why might this be a source of the difference in sex effects? Consideration of the  
523 distribution of IPDs in our sample (see **Fig. 7**) reveals that the average IPD for males is closely  
524 matched to the default device IPD of 64 mm. We should note, however, that the default IPD still  
525 misses the mark for many of the males in our sample. The situation is worse for females, for  
526 whom the average IPD is nearly 5 mm smaller than the default IPD. Mismatches between device  
527 and observer IPD will inevitably introduce cue conflicts, which will lead to motion sickness. Our  
528 results suggest that tailoring the IPD of the display to the individual may reduce motion sickness  
529 - that is, ensuring that the IPD of the device is matched to the IPD of the observer will reduce  
530 some sources of cue conflicts and will likely eliminate the sex differences reported in previous  
531 work (see also [16]).

532

533

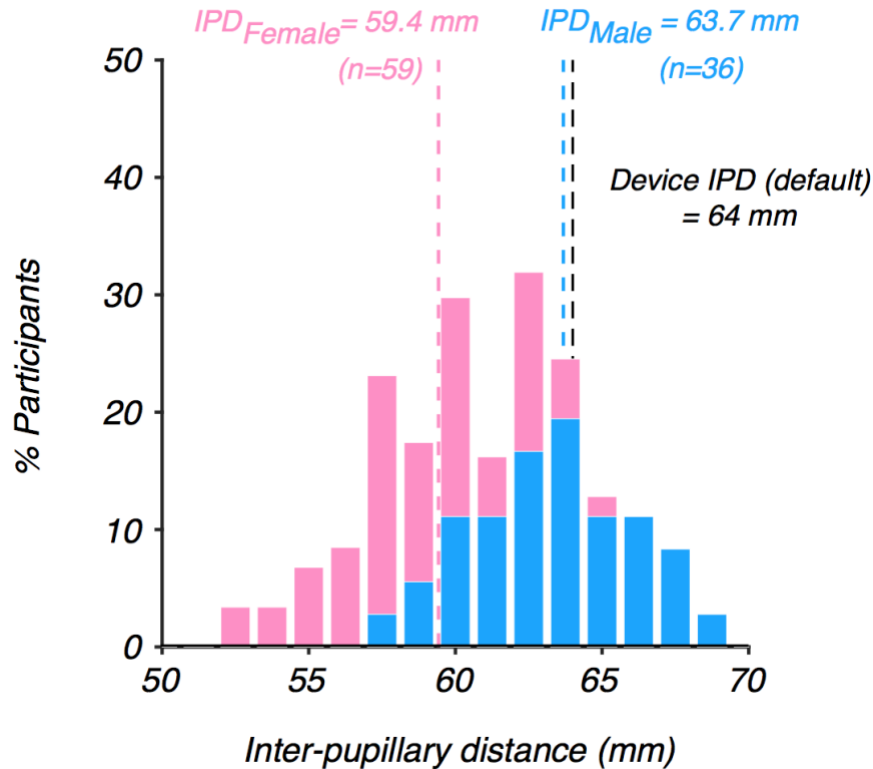

534

535 **Figure. 7. Inter-pupillary distance (IPD) for the sample of females (pink bars) and males**  
536 **(blue bars) in our experiments.** The average male IPD is well-matched to the default IPD of the  
537 Oculus DK2, whereas the average female IPD is approximately 5 mm smaller than the default.

538

539 One might assume that larger IPDs imply greater sensitivity to binocular cues and hence,  
540 that IPD *per se* is an important factor in motion sickness. This assumption is not backed up by  
541 our data - no relationship was found between IPD and average sensitivity ( $F(1,93) = 0.49, p =$   
542  $.49$ ). Moreover, although there was a trend towards individuals with larger IPDs reporting more  
543 severe levels of motion sickness due to video viewing, this relationship also did not reach  
544 significance ( $F(1,93) = 3.82, p = .054$ ). Finally, no relationship was found between observer  
545 height and motion sickness ( $F(1,93) = 0.64, p = .43$ ). Therefore, the large variability in

546 sensitivity to the 3D motion cues measured in our sample must lie in subsequent processing of  
547 motion-in-depth signals, not physical characteristics such as IPD or height *per se*.

### 548 3.5. Observers Reduce Head Movements to Regulate Motion Sickness

549 If motion sickness is caused by cue conflicts, a useful observer strategy would be to  
550 actively eliminate cue conflicts when motion sickness occurs. Since motion parallax-based  
551 conflicts appear to be the primary source of motion sickness in VR, observers could eliminate  
552 conflict by reducing head movement. This line of reasoning predicts that as individuals start to  
553 experience discomfort, they may suppress their head movement. To test whether this strategy is  
554 adopted by observers, we analyzed the head movement data collected during the four blocks of  
555 the motion task. Note that in three of those blocks, motion parallax cues were absent from the  
556 display and were thus in conflict with the parallax cues the observer should expect when they  
557 moved their head.

558 Because the stimuli were presented at fixation for a brief duration (250 ms), observers'  
559 head movements were small (on the order of millimeters and arcmins), and we refer to them as  
560 "head jitter". We first analyzed head jitter over the course of an experimental block to determine  
561 whether there is evidence of head jitter suppression. We found that on average across observers  
562 and experimental blocks, head jitter exhibited a U-shaped pattern: both the magnitude of  
563 translational and rotational head jitter declined before rebounding later in the experimental block  
564 (see **Fig. 8**). We interpret this pattern as the predicted suppression of head jitter to mitigate  
565 motion sickness symptoms, eventually transitioning to a "release" in head jitter once the end of  
566 the experimental block is in sight.

567

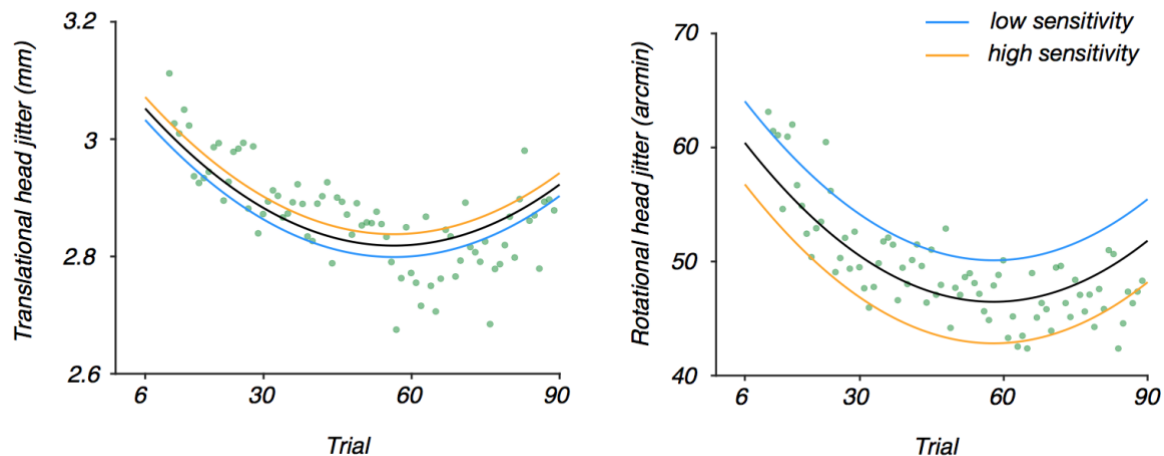

568

569 **Figure 8. Modulation of head jitter across trials.** For each observer, the average 3D  
570 translational head jitter and average 3D rotational head jitter were computed over the four blocks  
571 across trials. Data points depict the between-subject average of 3D translational head jitter (left  
572 plot) and average 3D rotational head jitter (right plot) across trials. Solid black lines correspond  
573 to the quadratic fit to the individual subject data points across trials. Orange lines correspond to  
574 fits for a high sensitivity observer whose sensitivity is one standard deviation above the mean,  
575 and blue lines correspond to fits for a low sensitivity observer whose sensitivity is 1 standard  
576 deviation below the mean. The quadratic pattern of both head jitter types indicates that observers  
577 suppress head movement over time, which may be used as a strategy to mitigate motion sickness  
578 symptoms, and then release head movement during later trials when they likely have experienced  
579 a reduction in motion sickness symptoms. Sensitivity to 3D sensory cues significantly modulates  
580 the degree of suppression of rotational head jitter only, suggesting that head movements along  
581 the rotational axes (i.e., yaw, pitch, and roll) contribute more strongly to motion sickness in VR  
582 environments.

583

584 We next asked whether the degree of suppression was modulated by an observer's  
585 average sensitivity across the four conditions. Specifically, we predicted that observers with  
586 greater sensitivity to 3D motion cues would more strongly suppress head jitter. Although

587 translational head jitter exhibited a U-shaped pattern, the effect of sensitivity did not reach  
588 significance ( $p = .78$ ). However, we did find a significant effect of sensitivity on rotational head  
589 jitter ( $F(1,7779) = 8.671, p = .003$ ). For every unit increase in an observer's sensitivity, rotational  
590 head jitter declined by 9.34 arcmin. This, coupled with the fact that head jitter tended to rebound  
591 after the initial suppression, suggests that observers dynamically self-regulated their discomfort  
592 by reducing their head movement.

593

#### 594 4. Discussion

595 An attractive aspect of virtual reality (VR) is that it can be used to present visual stimuli  
596 under more realistic viewing conditions. However, VR introduces discomfort for an estimated  
597 25-40% of individuals including motion sickness (e.g., [28]). In the current study, we have  
598 provided evidence that such discomfort arises from sensory cue conflicts, in particular, conflicts  
599 related to motion parallax cues.

600 Importantly, a cue cannot be a source of conflict if an observer is not sensitive to that cue.  
601 Sensitivity to sensory cues in VR was highly-variable across the large sample of observers we  
602 studied. Critically, a robust relationship emerged, whereby the greater an observer's sensitivity to  
603 motion parallax cues, the more severe the motion sickness symptoms. Although motion parallax  
604 cues were always present in concert with other cues to 3D motion, the fact that a relationship  
605 between cue sensitivity and motion sickness was not evident in any of the other stimulus  
606 conditions supports the notion that motion parallax cues in particular drive the conflict between  
607 visual and vestibular signals. This finding extends recent work showing that sensitivity to 3D  
608 motion cues more generally predicts motion sickness susceptibility [17] and provides targets for  
609 future research on causes and mitigation of motion sickness.



610 Our results also revealed an apparent tendency for observers to self-regulate motion  
611 sickness through head movement suppression. Indeed, head movement has previously been  
612 implicated in motion sickness. Observers decrease head movement when environments contain  
613 conflicting signals, such as in the slow rotation room (SRR; e.g., [4]) or virtual reality [29].  
614 Furthermore, motion sickness is reduced when the observer's torso or head is restrained [30]  
615 although postural precursors of motion sickness still exist under such conditions [31]-[32].  
616 Future work tracking motion sickness over time at more frequent intervals can confirm head  
617 movement reduction as a strategy for self-regulation of motion sickness.

618 Previous work has shown that rotational movements may play a particular role in motion  
619 sickness symptoms due to their role in increasingvection, which causes mismatches between  
620 visual and vestibular signals in virtual environments (e.g., [33]). Here, we showed that observers  
621 in general reduced their head movement in the early portion of each experimental block,  
622 followed by a rebound later in the block. Although this pattern was evident in both translational  
623 and rotational head movement, rotational head movement suppression was modulated by one's  
624 sensitivity to sensory cues. Thus, we have shown that sickness does not arise from head  
625 movement *per se*, but rather is related to an observer's sensitivity to sensory cues more  
626 generally.

627 Prior work has described the cues that may be in conflict in VR [34] and explored  
628 potential links between sensory processing and motion sickness. While stereoacuity is predictive  
629 of behavioral performance in virtual reality, there seems to be no relationship between  
630 stereoacuity itself and either sense of presence or sickness [35], a result we replicated here as  
631 well. By contrast, as a group, those that prematurely quit viewing video content in virtual reality  
632 have exhibited greater sensitivity to 3D motion cues [17], a result that served as a primary

633 motivator for the current study. Finally, beyond considerations of visual sensitivity, some studies  
634 have suggested that violations of sensory expectations contribute to motion sickness as well (e.g.,  
635 [36]).

636 While the aforementioned studies explore explanations of variation in motion sickness  
637 susceptibility based on cue conflict theory, alternative accounts exist. Postural instability theory  
638 posits that motion sickness is instead due to an inability to regulate postural sway [37]. A number  
639 of studies report postural precursors of motion sickness in movement magnitude preceding the  
640 onset of motion sickness symptoms in physical environments [38], video games [39], and virtual  
641 reality headsets [27]. Additionally, other measures of movement that are orthogonal to  
642 magnitude have also been implicated in motion sickness such as the width of the multifractal  
643 spectrum [27] and temporal movement dynamics [40]. While the literature on the relationship  
644 between postural instability and motion sickness is extensive, there is some debate on the exact  
645 nature of the relationship. Some studies suggest postural predictors of motion sickness exist in  
646 movements recorded before participants are exposed to motion stimuli of any kind (e.g., [26]-  
647 [27], [41]-[47]). However, other studies suggest instead that changes in sway occur at the same  
648 time as motion sickness onset [8], [48]-[49].

649 A second claim made by advocates of the postural instability theory is that postural sway  
650 is inherently different in females than males. Consequently, the theory predicts that females  
651 should exhibit a greater propensity for motion sickness. Indeed, sex-based differences in motion  
652 sickness are well established outside of VR (e.g., 50). Prior work in VR has found evidence for  
653 such sex differences in motion sickness susceptibility as well [17], [27], but see [27],[51], which  
654 suggest that sex differences may be task-specific. We did not find a relationship between sex and  
655 motion sickness in our study. We speculate that sex differences in motion sickness may be

656 modulated by additional factors. The current results suggest that inappropriate device calibration  
657 may exacerbate any inherent sex-based differences in susceptibility to motion sickness. Instead  
658 of relying on a default IPD and height as has been typical in prior research, we carefully  
659 calibrated the HMD to match the IPD and height of each observer.

660         The data presented here relied on the Oculus DK2 and one might ask to what extent  
661 motion sickness could be mitigated by newer generations of headsets with enhanced  
662 specifications (e.g., improved display properties, more comfortable designs, etc.). Our primary  
663 findings demonstrate that the extent to which one is sensitive to motion parallax information  
664 predicts one's susceptibility to motion sickness. Thus, although the display quality and weight of  
665 the headset may certainly have elicited some discomfort, head-tracking and scene updating are  
666 expected to be more critical factors in general given our results. To our knowledge, the tracking  
667 specifications of newer devices are not dramatically different and, thus, the results presented here  
668 should generalize.

669         It has been suggested that administering a motion sickness questionnaire by itself creates  
670 an expectation that an observer will get sick, elevating scores upon repeated administration [52].  
671 However, some observers reported little to no sickness after video viewing (see Figure 4),  
672 suggesting that the "inflation effects" of repeated SSQs reported by [52] were not shared by all  
673 participants in our study. Furthermore, when comparing sickness reports across all stages, the  
674 increase in sickness was not linear - responses after the 3D motion discrimination task exhibited  
675 a smaller increase on average relative to baseline, compared to the much more dramatic increase  
676 on average after video viewing both relative to the post-task and post-baseline reports, consistent  
677 with our a priori expectations. Finally, for the inflation effect to drive our results, the effect  
678 would need to have been larger for individuals with greater visual sensitivity to motion parallax

679 cues, which we find difficult to justify. Therefore, while we cannot exclude that inflation might  
680 have occurred across repeated test administration in our design, it is unlikely that our results can  
681 be explained on that basis.

682 In conclusion, the current results account for variability in susceptibility to VR-induced  
683 motion sickness across individuals but imply that those individuals who would benefit the most  
684 from the visual cues that can be presented in VR are also those who may experience the most  
685 discomfort [17]. Our results suggest that motion sickness is not a “necessary evil” of VR  
686 technology. Our results motivate a number of strategies that can reduce sources of conflict and  
687 make the technology more accessible. First, VR experiences with modes that require less  
688 dramatic head movements by including alternative ways to complete tasks such as “teleporting”  
689 rather than navigating may offer more comfortable experiences. Second, experiences in which  
690 the intensity of the sickness-inducing cues is gradually increased over multiple exposures, can be  
691 an effective way to reduce motion sickness [53]-[54], thus slowly increasing the intensity of VR  
692 exposure may be an important recommendation for new users. Similarly, a somewhat  
693 counterintuitive option is to make the visual cues that induce motion sickness less reliable, by for  
694 example blurring, contrast reduction, or reducing the fidelity of the visual display through other  
695 means. Under such conditions observers will downweigh or even completely discount these cues,  
696 reducing the cue conflict signals produced by them, and therefore lower their susceptibility to  
697 motion sickness.

698

699

700

701

702 **Acknowledgements**

703 We would like to thank Xuanxuan Ge and Elizabeth Shank for assistance with subject  
704 recruitment and data collection.

705

706 **References**

- 707 [1] J.J. LaViola, A discussion of cybersickness in virtual environments, ACM Sigchi Bull., 32  
708 (2000) 47-56. <https://doi.org/10.1145/333329.333344>.
- 709
- 710 [2] J.T. Reason, Motion sickness adaptation: a neural mismatch model, J. Roy. Soc. of Med., 71  
711 (1978) 819-829. <https://doi.org/10.1177/014107687807101109>.
- 712
- 713 [3] B. Keshavarz, H. Hecht, L. Zschuschke, Intra-visual conflict in visually induced motion  
714 sickness. Displays, 32, (2011) 181-188. <https://doi.org/10.1016/j.displa.2011.05.009>.
- 715
- 716 [4] J.T. Reason,, J.J. Brand, Motion sickness, Academic press, 1975.
- 717
- 718 [5] C.M. Oman, Motion sickness: a synthesis and evaluation of the sensory conflict theory, Can.  
719 J. Phys. & Pharm., 68 (1990) 294-303. <https://doi.org/10.1139/y90-044>.
- 720
- 721 [6] P.A. Howarth, P.J. Costello, The occurrence of virtual simulation sickness symptoms when  
722 an HMD was used as a personal viewing system. Displays, 18, (1997) 107-116.  
723 [https://doi.org/10.1016/S0141-9382\(97\)00011-5](https://doi.org/10.1016/S0141-9382(97)00011-5).
- 724
- 725 [7] H. Akiduki, S. Nishiike, H. Watanabe, K. Matsuoka, T. Kubo, N. Takeda. Visual-vestibular  
726 conflict induced by virtual reality in humans. Neuro. Letters, 340, (2003) 197-200.  
727 [https://doi.org/10.1016/S0304-3940\(03\)00098-3](https://doi.org/10.1016/S0304-3940(03)00098-3).
- 728
- 729 [8] S. Nishiike, S. Okazaki, H. Watanabe, H. Akizuki, T. Imai, A. Uno, T. Kitahara, A. Horii, N.  
730 Takeda, H. Inohara, The effect of visual-vestibulosomatosensory conflict induced by virtual  
731 reality on postural stability in humans. J. Med. Inv., 60, (2013) 236-239.  
732 <https://doi.org/10.2152/jmi.60.236>.

733

- 734 [9] K. Money, Motion sickness and evolution. Motion and space sickness (A 93-55929 24-52).  
735 Boca Raton, FL, CRC Press, Inc., (1990) 1-7.  
736
- 737 [10] M. Treisman, Motion sickness: an evolutionary hypothesis. Science, 197, (1977) 493-495.  
738 <https://doi.org/10.1126/science.301659>.  
739
- 740 [11] A.M. Bronstein, J.F. Golding, M.A. Gresty, Vertigo and dizziness from environmental  
741 motion: visual vertigo, motion sickness, and drivers' disorientation, in: Seminars in neurology,  
742 2013 pp. 219-230. <https://doi.org/10.1055/s-0033-1354602>.  
743
- 744 [12] J.R. Lackner, Motion sickness: more than nausea and vomiting. Exp. Brain Res., 232,  
745 (2014) 2493-2510. <https://doi.org/10.1007/s00221-014-4008-8>.  
746
- 747 [13] A.C. Paillard, G. Quarck, F. Paolino, P. Denise, M. Paolino, J.F. Golding, V. Ghulyan-  
748 Bedikian, Motion sickness susceptibility in healthy subjects and vestibular patients: effects of  
749 gender, age and trait-anxiety. J. Vest. Res., 23, (2013) 203-209. [https://doi.org/10.3233/VES-](https://doi.org/10.3233/VES-130501)  
750 [130501](https://doi.org/10.3233/VES-130501).  
751
- 752 [14] A. Graybiel, R.S. Kennedy, The Dial Test-A standardized procedure for the experimental  
753 production of canal sickness symptomatology in a rotating environment. Naval School of  
754 Aviation Medicine Pensacola FL. (1965) retrieved from:  
755 <http://www.dtic.mil/docs/citations/AD0625863>. <https://doi.org/10.21236/AD0625863>.  
756
- 757 [15] B. Allen, A.M. Haun, T. Hanley, C.S. Green, B. Rokers, Optimal combination of the  
758 binocular cues to 3D motion. Invest. Ophth. & Vis. Sci., 56, (2015) 7589-7596.  
759 <https://doi.org/10.1167/iovs.15-17696>.  
760
- 761 [16] K. Stanney, C. Fidopiastis, L. Foster. Virtual reality is sexist: But it does not have to be.  
762 Front. in Rob. and AI, 7, (2020) 4. doi: 10.3389/frobt.2020.00004  
763
- 764 [17] B. Allen, T. Hanley, B. Rokers, C.S. Green, Visual 3D motion acuity predicts discomfort in  
765 3D stereoscopic environments. Enter. Comp., 13, (2016) 1-9.  
766 <https://doi.org/10.1016/j.entcom.2016.01.001>.  
767
- 768 [18] D.H. Brainard, The psychophysics toolbox. Spat. Vis., 10, (1997) 433-436.  
769 <https://doi.org/10.1163/156856897X00357>.  
770
- 771 [19] M. Kleiner, D. Brainard, D. Pelli, What's new in Psychtoolbox-3?. Percept., 36, (2007) 1.

772

773 [20] D.G. Pelli, The VideoToolbox software for visual psychophysics: Transforming numbers  
774 into movies. *Spat. Vis.*, 10, (1997) 437-442. <https://doi.org/10.1163/156856897X00366>.

775

776 [21] R.S. Kennedy, N.E. Lane, K.S. Berbaum, M.G. Lilienthal, Simulator sickness questionnaire:  
777 An enhanced method for quantifying simulator sickness. *The Int. J. of Aviation Psych.*, 3, (1993)  
778 203-220. [https://doi.org/10.1207/s15327108ijap0303\\_3](https://doi.org/10.1207/s15327108ijap0303_3)

779

780

781 [22] K.I. Beverley, D. Regan. Evidence for the existence of neural mechanisms selectively  
782 sensitive to the direction of movement in space. *The J. of Phys.*, 235, (1973) 17-29.  
783 <https://doi.org/10.1113/jphysiol.1973.sp010376>

784

785 [23] E. Brenner, A.V. Van Den Berg, W.J. Van Damme. Perceived motion in depth. *Vis.*  
786 *Res.*, 36, (1996) 699-706. [https://doi.org/10.1016/0042-6989\(95\)00146-8](https://doi.org/10.1016/0042-6989(95)00146-8)

787

788 [24] H.T. Nefs, L. O'Hare, J.M. Harris. Two independent mechanisms for motion-in-depth  
789 perception: Evidence from individual differences. *Front. in Psych.*, 155, (2010) 1-8.  
790 <https://doi.org/10.3389/fpsyg.2010.00155>

791

792 [25] J.M. Fulvio, B. Rokers. Use of cues in virtual reality depends on visual feedback. *Sci.*  
793 *Rep.*, 7, (2017) 1-13. <https://doi.org/10.1038/s41598-017-16161-3>

794

795 [26] F. Koslucher, J. Munafo, T.A. Stoffregen. Postural sway in men and women during  
796 nauseogenic motion of the illuminated environment. *Exp. Brain Res.*, 234, (2016) 2709-2720.  
797 <https://doi.org/10.1007/s00221-016-4675-8>

798

799 [27] J. Munafo, M. Diedrick, T.A. Stoffregen, The virtual reality head-mounted display Oculus  
800 Rift induces motion sickness and is sexist in its effects. *Exp. Brain Res.*, 235, (2017) 889-901.  
801 <https://doi.org/10.1007/s00221-016-4846-7>.

802

803 [28] J. Treleaven, J. Battershill, D. Cole, C. Fadelli, S. Freestone, K. Lang, H. Sarig-Bahat.  
804 Simulator sickness incidence and susceptibility during neck motion-controlled virtual reality  
805 tasks. *Vir. Real.*, 19, (2015) 267-275. <https://doi.org/10.1007/s10055-015-0266-4>

806

807 [29] S.V. Cobb, S. Nichols, A. Ramsey, J.R. Wilson. Virtual reality-induced symptoms and  
808 effects (VRISE). *Pres: Teleoper. & Vir. Env.*, 8(2), (1999) 169-186.  
809 <https://doi.org/10.1162/105474699566152>

- 810 [30] B. Keshavarz, A.C. Novak, L.J. Hettinger, T.A. Stoffregen, J.L. Campos. Passive restraint  
811 reduces visually induced motion sickness in older adults. *J. of Exp. Psych.: Applied*, 23, (2017)  
812 85-99. <https://doi.org/10.1037/xap0000107>  
813
- 814 [31] C.T. Bonnet, E.M. Faugloire, M.A. Riley, B.G. Bardy, T.A. Stoffregen. Self-induced  
815 motion sickness and body movement during passive restraint. *Ecol. Psych.*, 20, (2008) 121-  
816 145. <https://doi.org/10.1080/10407410801949289>  
817
- 818 [32] E. Faugloire, C.T. Bonnet, M.A. Riley, B.G. Bardy, T.A. Stoffregen. Motion sickness, body  
819 movement, and claustrophobia during passive restraint. *Exp. Brain Res.*, 177, (2007) 520-532.  
820 DOI: 10.1007/s00221-006-0700-7  
821
- 822 [33] R.H. So, W.T. Lo, Cybersickness: an experimental study to isolate the effects of rotational  
823 scene oscillations. In *Proc. IEEE Virtual Reality (Cat. No. 99CB36316)* (1999) pp. 237-241.  
824
- 825 [34] A.D. Hwang, E.Peli. Instability of the perceived world while watching 3D stereoscopic  
826 imagery: A likely source of motion sickness symptoms. *i-Perc.*, 5, (2014) 515-535.  
827 <https://doi.org/10.1068/i0647>  
828
- 829 [35] K.S. Hale, K.M. Stanney. Effects of low stereo acuity on performance, presence and  
830 sickness within a virtual environment. *App. Erg.*, 37, (2006) 329-339.  
831 <https://doi.org/10.1016/j.apergo.2005.06.009>  
832
- 833 [36] J.F. Golding, K. Doolan, A. Acharya, M. Tribak, M.A. Gresty. Cognitive cues and visually  
834 induced motion sickness. *Aviation, Space, and Envi. Med.*, 83, (2012) 477-482.  
835 <https://doi.org/10.3357/ASEM.3095.2012>  
836
- 837 [37] G.E. Riccio, T.A. Stoffregen, An ecological theory of motion sickness and postural  
838 instability. *Eco. Psych.*, 3, (1991) 195-240. [https://doi.org/10.1207/s15326969eco0303\\_2](https://doi.org/10.1207/s15326969eco0303_2)  
839
- 840 [38] L.J. Smart, T.A. Stoffregen, B.G. Bardy, Visually induced motion sickness predicted by  
841 postural instability, *Human Factors*, 44, (2002) 451-465.  
842 <https://doi.org/10.1518/0018720024497745>  
843
- 844 [39] T.A. Stoffregen, E. Faugloire, K. Yoshida, M.B. Flanagan, O. Merhi, Motion sickness and  
845 postural sway in console video games, *Human Factors*, 50, (2008) 322-331.  
846 <https://doi.org/10.1518/001872008X250755>  
847



- 848 [40] T.A. Stoffregen, C.-H. Chang, F.-C. Chen, W.-J. Zeng. Effects of decades of physical  
849 driving on body movement and motion sickness during virtual driving. PLOS ONE, 12, (2017).  
850 e0187120. <https://doi.org/10.1371/journal.pone.0187120>  
851
- 852 [41] B. Arcioni, S. Palmisano, D. Apthorp, J. Kim. Postural stability predicts the likelihood of  
853 cybersickness in active HMD-based virtual reality. Displays, 58, (2019) 3-11.  
854 <https://doi.org/10.1016/j.displa.2018.07.001>  
855
- 856 [42] F.C. Koslucher, E. Haaland, T.A. Stoffregen. Body load and the postural precursors of  
857 motion sickness. Gait & Posture, 39, (2014) 606-610.  
858 <https://doi.org/10.1016/j.gaitpost.2013.09.016>  
859
- 860 [43] R. Li, H. Walter, C. Curry, R. Rath, N. Peterson, T.A. Stoffregen. Postural time-to-contact  
861 as a precursor of visually induced motion sickness. Exp. Brain Res., 236, (2018) 1631-1641.  
862 <https://doi.org/10.1007/s00221-018-5246-y>  
863
- 864 [44] S. Palmisano, B. Arcioni, P.J. Stapley. Predicting vection and visually induced motion  
865 sickness based on spontaneous postural activity. Exp. Brain Res., 236, (2018) 315-329.  
866
- 867 [45] T.A. Stoffregen, F.C. Chen, M. Varlet, C. Alcantara, B.G. Bardy. Getting your sea legs.  
868 PLoS One, 8, (2013) e66949.  
869
- 870 [46] T.A. Stoffregen, L.J. Smart. Postural instability precedes motion sickness. Brain Res. Bull.,  
871 47, (1998) 437-448. [https://doi.org/10.1016/S0361-9230\(98\)00102-6](https://doi.org/10.1016/S0361-9230(98)00102-6)  
872
- 873 [47] S. Weech, J.P. Varghese, M. Barnett-Cowan. Estimating the sensorimotor components of  
874 cybersickness. J. of Neurophys., 120, (2018) 2201-2217. <https://doi.org/10.1152/jn.00477.2018>  
875
- 876 [48] Z. Nachum, A. Shupak, V. Letichevsky, J. Ben-David, D. Tal, A. Tamir, Y. Talmon, C.  
877 Gordon, M. Luntz, Mal de débarquement and posture: reduced reliance on vestibular and visual  
878 cues. The Laryngoscope, 114, (2004) 581-586. <https://doi.org/10.1097/00005537-200403000-00036>.  
879  
880
- 881 [49] H. Akizuki, A. Uno, K. Arai, S. Morioka, S. Ohyama, S. Nishiike, K. Tamura, N. Takeda,  
882 Effects of immersion in virtual reality on postural control. Neuro. Letters, 379, (2005) 23-26.  
883 <https://doi.org/10.1016/j.neulet.2004.12.041>.  
884

- 885 [50] A. Lawther, M.J. Griffin. A survey of the occurrence of motion sickness amongst  
886 passengers at sea. *Aviation, Space, and Env. Med.*, 59, (1988) 399–406.  
887
- 888 [51] C. Curry, R. Li, N.A. Peterson, T.A. Stoffregen. Cybersickness in virtual reality  
889 headmounted displays: Examining the influence of sex differences and vehicle control. *Int. J. of*  
890 *Human-Comp. Inter.*, 36, (2020) 1161-1167. <https://doi.org/10.1080/10447318.2020.1726108>  
891
- 892 [52] S.D. Young, B.D. Adelstein, S.R. Ellis, Demand characteristics in assessing motion sickness  
893 in a virtual environment: or does taking a motion sickness questionnaire make you sick? *IEEE*  
894 *Trans. Visual. Comp. Graph.* 13, (2007) 422-428. 10.1109/TVCG.2007.1029  
895
- 896 [53] A. Graybiel, C.D. Wood, Rapid vestibular adaptation in a rotating environment by means of  
897 controlled head movements. *Aero Med*, 40, (1968) 638–643.  
898 <https://doi.org/10.1037/e460462004-001>.  
899
- 900 [54] F. Yen Pik Sang, J. Billar, M.A. Gresty, J.F. Golding, Effect of a novel motion  
901 desensitization training regime and controlled breathing on habituation to motion sickness. *Perc*  
902 *and Motor Skills*, 18, (2005) 29-34. <https://doi.org/10.2466/pms.101.1.244-256>.  
903
